# Supplementary material
Source: Springer Nature journal article supplement (https://www.springermedizin.de/resource/supplementary/12937_2010_310_MOESM2_ESM.pdf/25654842)
Supplement: MOESM2 [file 25654842]

**Table 2. Immunomodulatory Non-Glucan Extracts: Oral Animal Studies**

| Extract                                       | Source                               | Animal                                  | Oral dose/day                         | Duration                                       | Treatment                                     | Significant effects                                                                                                                                                                                                                                      | Reference                                                                  |
|-----------------------------------------------|--------------------------------------|-----------------------------------------|---------------------------------------|------------------------------------------------|-----------------------------------------------|----------------------------------------------------------------------------------------------------------------------------------------------------------------------------------------------------------------------------------------------------------|----------------------------------------------------------------------------|
| Fucoidans                                     | <i>Cladosiphon okamuranus Tokida</i> | 8-week ♀ BALB/c mice, 10/group          | 0.05% w/w of diet                     | 56 days                                        | DSS-induced UC                                | ↓ disease activity index and myeloperoxidase activity; ↓ # of B220-positive colonic B cells; ↓ colonic MLN IFN- $\gamma$ and IL-6 and ↑ IL-10 and TGF- $\beta$ ; ↓ colonic IgG; ↓ colonic epithelial cell IL-6, TNF- $\alpha$ , and TLR4 mRNA expression | [49]                                                                       |
|                                               |                                      | <i>Undaria pinnatifida</i>              | 5-week ♀ BALB/c mice (10-12/group)    | 5 mg, days 1-14 or 7-14                        | 2 weeks                                       | Injected HSV into cornea day 7                                                                                                                                                                                                                           | ↓ facial herpetic lesions; ↑ survival, particularly in pre-treated animals |
|                                               | 10 mg                                |                                         | 1 week                                | Administered 5-fluorouracil                    | ↑ plasma NK cell activity                     |                                                                                                                                                                                                                                                          |                                                                            |
|                                               | 0.1 or 0.5 mg                        |                                         | 3 weeks                               | Injected SC HSV                                | ↑ cytotoxic splenic T lymphocyte activity     |                                                                                                                                                                                                                                                          |                                                                            |
|                                               | 6-week ♂ ddY mice (5/group)          | 50, 100, 200 400 or 500 mg/kg days 1-28 | 3 weeks                               | Injected with Ehrlich carcinoma in back day 14 | 200-500 mg/kg ↓ tumor growth                  | [116]                                                                                                                                                                                                                                                    |                                                                            |
| 6-week ♂ BALB/c mice (8/group)                | 40 mg/kg alternating days 7-19       | 19 days                                 | Injected IP Meth A fibrosarcoma day 1 | ↓ tumor growth                                 |                                               |                                                                                                                                                                                                                                                          |                                                                            |
| Furanose (COLD-FX®)                           | <i>Panax quinquefolium</i>           | Weanling ♂ SD rats (10/group)           | 450 or 900 mg/kg in food              | 1 week                                         | Healthy animals                               | Both doses ↑ spleen IL-2 and IFN- $\gamma$ production following ConA or LPS stimulation; ↓ proportion of total MLN and Peyer's patch CD3+ cells & activated T cells; high dose ↑ spleen cell IL-1 $\beta$ production following 48 h ConA stimulation.    | [33]                                                                       |
| Galactomannan (partially hydrolyzed guar gum) | <i>Cyamopsis tetragonolobus</i>      | 10-week ♀ BALB/c mice, 11-15/group      | 5% of diet                            | 3 weeks                                        | DSS-induced UC at beginning of week 3         | ↓ disease activity index scores, ↓ colonic mucosal myeloperoxidase activity & lipid peroxidation; ↓ colonic TNF- $\alpha$ protein levels & mRNA expression up regulated by DSS exposure                                                                  | [50]                                                                       |
| Galactomannans (guar gum)                     |                                      | 8-month- SD rats, 5/group               | 5% of diet                            | 3 weeks                                        | Older animals                                 | ↓ serum IgG; ↑ MLN lymphocyte IgA, IgM and IgG production                                                                                                                                                                                                | [36]                                                                       |
| Glucomannan (KS-2)                            | <i>Lentinula edodes</i>              | DD1 mice (10-20/group)                  | 140 mg/kg days 2-13                   | 50 days                                        | Injected IP Ehrlich ascites tumor cells day 1 | ↑ survival                                                                                                                                                                                                                                               | [84]                                                                       |

|                                                                                           |                                                                             |                                                                                                       |                                                                                                             |          |                                                                                                                      |                                                                                                                                                                                                                                      |      |
|-------------------------------------------------------------------------------------------|-----------------------------------------------------------------------------|-------------------------------------------------------------------------------------------------------|-------------------------------------------------------------------------------------------------------------|----------|----------------------------------------------------------------------------------------------------------------------|--------------------------------------------------------------------------------------------------------------------------------------------------------------------------------------------------------------------------------------|------|
|                                                                                           |                                                                             |                                                                                                       | 0.1, 1, 10, or 100 mg/kg dose days 2-13                                                                     | 100 days | Injected Sarcoma-180 tumor cells day 1                                                                               | 1, 10, and 100 mg/kg doses ↑ survival                                                                                                                                                                                                |      |
| Heteroglycan (ATOM)                                                                       | <i>A. subrufescens</i>                                                      | Mice (10/group): 1) 5-week ♂ Swiss/NIH; 6 week- ♀ DS mice; 3) 8-week ♀ BALB/c nude; 4) 5-week C3H/HcN | 100 or 300 mg/kg days 2-11                                                                                  | 8 weeks  | Implanted SC 1) Sarcoma-180, 2) Shionogi carcinoma 42, 3) Meth A fibrosarcoma, or 4) Ehrlich ascites carcinoma cells | Both doses ↓ Sarcoma-180 tumor size at 4 weeks & ↑ survival; 300 mg/kg ↑ peritoneal macrophage and C3-positive cells; 300 mg/kg ↓ Shionogi and Meth A tumor sizes at 4 weeks. Both doses ↑ survival of Ehrlich ascites mice          | [93] |
| Heteroglycan (LBP <sub>3p</sub> )                                                         | <i>Lycium barbarum</i>                                                      | ♂ Kunming mice (10/group)                                                                             | 5, 10 or 20 mg/kg                                                                                           | 10 days  | Injected SC Sarcoma-180 cells                                                                                        | 5 & 10 mg/kg ↑ thymus index; all doses ↓ weight, ↓ lipid peroxidation in serum, liver and spleen & ↑ spleen lymphocyte proliferation, cytotoxic T cell activity, IL-2 mRNA                                                           | [91] |
| Heteroglycan (PNPS-1)                                                                     | <i>Pholiota nameko</i>                                                      | SD rats (5/group)                                                                                     | 100, 200 or 400 mg/kg days 1-8                                                                              | 8 days   | Implanted SC cotton pellets in scapular region day 1                                                                 | ↓ granuloma growth positively correlated with dose: 11%, 18% and 44%, respectively                                                                                                                                                   | [55] |
| Heteroglycan (PG101)                                                                      | <i>Lentinus lepideus</i>                                                    | 8-10-week ♀ BALB/c mice (3/group)                                                                     | 10 mg                                                                                                       | 24 days  | 6 Gy gamma irradiation                                                                                               | ↑ colony forming cells, granulocyte CFUs/Mφ, erythroid burst-forming units, and myeloid progenitor cells in bone marrow; induced proliferation of granulocyte progenitor cells in bone marrow; ↑ serum levels of GM-CSF, IL-6, IL-1β | [92] |
| Mixed polysaccharides (Ambrotose <sup>®</sup> or Advanced Ambrotose <sup>®</sup> powders) | <i>Aloe barbadensis</i> , <i>Larix</i> spp, and other plant polysaccharides | ♂ SD rats (10/group)                                                                                  | 37.7 or 377 mg/kg Ambrotose <sup>®</sup> powder or 57.4 or 574 mg/kg Advanced Ambrotose <sup>®</sup> powder | 2 weeks  | 5% DSS in drinking water beginning day 6                                                                             | 574 mg/kg Advanced Ambrotose powder ↓ DAI scores; 377 mg/kg Ambrotose complex & both doses Advanced Ambrotose powder ↑ colon length and ↓ blood monocyte count                                                                       | [52] |
| Pectin                                                                                    | <i>Pyrus pyrifolia</i>                                                      | 6-8-week ♂ BALB/c mice (11/group)                                                                     | 100 µg days 1-7                                                                                             | 22 days  | Injected IP OVA day 7, provoked with OVA aerosol day 21                                                              | bronchial fluid: ↓ IFN-γ & ↑ IL-5; splenic cells: ↑ IFN-γ, ↓ IL-5; normalized pulmonary histopathological changes; ↓ serum IgE                                                                                                       | [54] |
| Pectins (bupleurum 2IIc)                                                                  | <i>Bupleurum falcatum</i>                                                   | 6-8-week ♀ specific-pathogen-free C3H/HeJ mice                                                        | 250 mg/kg                                                                                                   | 1 week   | Healthy animals                                                                                                      | ↑ spleen cell proliferation                                                                                                                                                                                                          | [35] |
| Pectins (highly methoxylated)                                                             | <i>Malus</i> spp.                                                           | 8-month- SD rats (5/group)                                                                            | 5% of diet vs. cellulose control                                                                            | 3 weeks  | Older animals                                                                                                        | ↑ MLN lymphocyte IgA & IgG                                                                                                                                                                                                           | [36] |

|                    |                                       |                                       |                                                                  |                                               |                                                                                                                        |                                                                                                                                            |      |
|--------------------|---------------------------------------|---------------------------------------|------------------------------------------------------------------|-----------------------------------------------|------------------------------------------------------------------------------------------------------------------------|--------------------------------------------------------------------------------------------------------------------------------------------|------|
| Pectins            | Citrus spp.                           | 5-week ♀ F344 rats<br>(30/group)      | 15% of diet                                                      | 34 weeks                                      | Injected SC AOM<br>once a week, weeks<br>4-14                                                                          | ↓ colon tumor incidence                                                                                                                    | [86] |
|                    | <i>Malus</i> spp.                     | 5-week ♀ BALB/c mice<br>(6/group)     | 5% of diet                                                       | 2 weeks                                       | Healthy animals                                                                                                        | ↑ fecal IgA and MLN CD4+/CD8+ T<br>lymphocyte ratio & IL-2 & IFN-γ secretion by<br>ConA-stimulated MLN lymphocytes                         | [51] |
|                    |                                       | 5-week ♀ BALB/c mice<br>(6/group)     | 5% of diet days 5-<br>19 vs. cellulose<br>control                | 19 days                                       | DSS-induced UC<br>days 1-5                                                                                             | Significantly increased MLN lymphocytes IgA,<br>and significantly decreased IgE; significantly<br>decreased ConA-stimulated IL-4 and IL-10 |      |
|                    |                                       | 4-week ♂ Donryu rats<br>(20-21/group) | 20% of diet                                                      | 32 weeks                                      | Injected SC AOM<br>once a week,<br>weeks 2-12                                                                          | ↓ colon tumor incidence                                                                                                                    | [85] |
|                    | 4-week ♂ Donryu rats<br>(19-20/group) | 10 or 20% of diet                     | 32 weeks                                                         | Injected SC AOM<br>once a week,<br>weeks 2-12 | Both doses ↓ colon tumor incidence; 20% ↓<br>tumor occupied area & ↓ portal blood and distal<br>colon PGE <sub>2</sub> | [90]                                                                                                                                       |      |
| Pectins (modified) | Citrus spp.                           | 2-4-month BALB/c mice<br>(9-10/group) | 0.8 or 1.6 mg/ml<br>drinking water,<br>days 8-20                 | 20 days                                       | Injected SC with<br>2x2 mm section of<br>human colon-25<br>tumor on day 1                                              | Both doses ↓ tumor size                                                                                                                    | [87] |
|                    |                                       | NCR nu/nu mice<br>(10/group)          | 1% (w/v) drinking<br>water                                       | 16 weeks                                      | Orthotopically<br>injected human<br>breast carcinoma<br>cells (MDA-MB-<br>435) into mammary<br>fat pad on day 7        | ↓ tumor growth rate & volume at 7 weeks, lung<br>metastases at 15 weeks, # of blood<br>vessels/tumor at 33 days post-injection             | [89] |
|                    |                                       | NCR nu/nu mice<br>(10/group)          | 1% (w/v) drinking<br>water                                       | 7 weeks                                       | Injected human<br>colon carcinoma<br>cells (LSLi6) into<br>cecum on day 7                                              | ↓ tumor weights and metastases to the lymph<br>nodes and liver                                                                             |      |
|                    |                                       | SD rats (7-8/group)                   | 0.01%, 0.1% or<br>1.0% wt/vol of<br>drinking water,<br>days 4-30 | 1 month                                       | Injected SC MAT-<br>LyLu rat prostate<br>cancer cells                                                                  | 0.1% and 1.0% ↓ lung metastases; 1.0% ↓<br>lymph node disease incidence                                                                    | [88] |
